# Supplementary material for: Influence of Bulk Microphysics Schemes upon Weather Research and Forecasting (WRF) Version 3.6.1 Nor'easter Simulations
Source: Copernicus journal article supplement (doi:10.5194/gmd-2016-151), 2016-06-24
Supplement: Supplementary file [file gmd-2016-151-AC2-supplement.pdf]

## Responses to Anonymous Referee #2 (Page 1)

My co-authors and I wish to thank Reviewer #2 for their time and consideration in reviewing this manuscript. Many comments are consistent with those of Reviewer #1 and have been incorporated into the revised manuscript.

### General Comments

- 1) *I think that the spin-up time of 72 hours is too long for a simulation without any kind of assimilation. A test with a shorter spin up (12 hours) could be recommendable*

In light of your suggestion and a similar comment from Reviewer #1, we shifted the model initialization time forward until 24 hours prior to cyclogenesis off the Mid-Atlantic United States and re-ran all 35 WRF model simulations. We set our start time 24 hours beforehand because simulated radar reflectivity fields still appeared slightly “blooby” up through 9-10 hours. Starting the model simulations 24 hours before primary cyclogenesis allowed for full development of simulated radar reflectivity structures and WRF-GMA track differences tended to be modest (<50 km).

- 2) *“A microphysical comparison with observations could be useful because this topic is the main focus of the paper. Is it possible to retrieve data from radar or satellite platform”*

Thanks to your suggestion, we have given this revised paper more of a microphysics-style focus. I looked both into TRMM and CloudSat 2C-Ice products. TRMM offers a wide range radar observations but its orbital inclination is 35 degree ([http://disc.sci.gsfc.nasa.gov/precipitation/additional/instruments/trmm\\_instr.html](http://disc.sci.gsfc.nasa.gov/precipitation/additional/instruments/trmm_instr.html)), which limits its usefulness when only half my analysis domains falls equatorward of 35°N. CloudSAT does provide profiles cloud ice, which my colleague used in a recent paper on global cloud species. Its narrow swath range (see Figure 3) made getting a consistent “hit” on a nor’easter challenging.

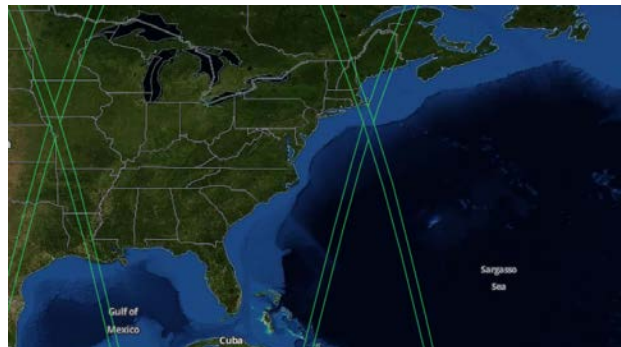

**Fig. 3:** CloudSAT orbital overpass sample from 2012.

I did find success with the Multi-Radar Multi-Sensor product from National Oceanographic and Atmospheric Association (NOAA), which provides hourly gridded 3D volume scans at 1-hour intervals (See Figure 4). Similar to StageIV, MRMS data only covers part of domain 4 in many of the seven cases, but the results thus far have been reasonable and useful.

## Responses to Anonymous Referee #2 (Page 2)

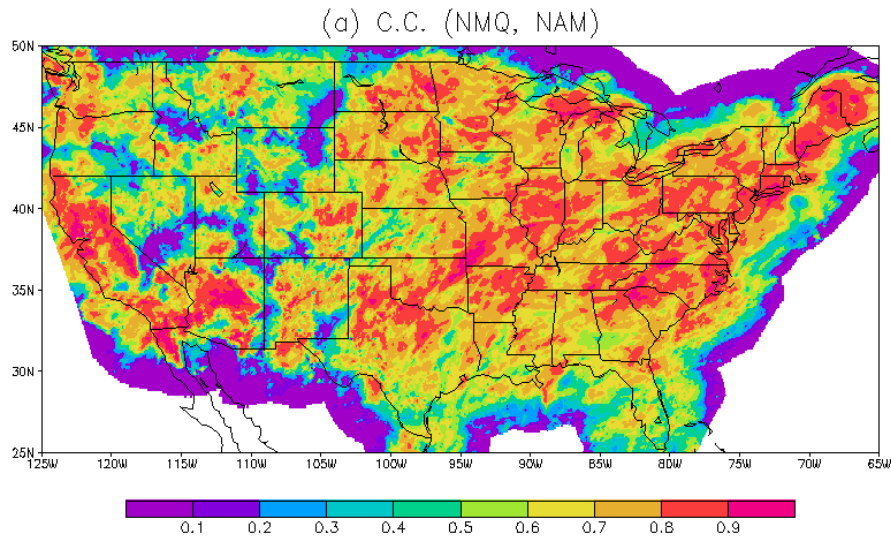

**Fig. 4:** MRMS coverage area (everywhere with colors).

### Specific Comments:

1) *Line 133:  $w$  is the mixing ratio of rain?*

Although ‘ $w$ ’ is often used in meteorology to denote mixing ratio, it represents vertical velocity in the energy norm equation. Instead, this formula uses ‘ $q$ ’ to represent mixing ratio. With the removal of the energy norm from the paper’s results this particular comment is no longer valid.

2) *Line 203: Not Fig. 4 but Fig. 5*

Thank you for catching the typo. I have corrected the manuscript to refer to Fig. 5.

3) *Figs. 5-6-7: insert letters in the panel to easy the reading of section 3.*

While I will not dispute that Figs. 5-7 do attempt to show much data. In an earlier form of this paper, I actually tried putting letters into the panels, but these letters were difficult to place without blocking or interfering with the displayed data. I thank you for the suggestion, but I have decided to keep my “Microsoft Excel-like” approach to plot labelling.
